# Supplementary material for: A multifunctional ratiometric electrochemical sensor for combined determination of indole-3-acetic acid and salicylic acid
Source: PubMed Central journal article supplement — RSC Adv. 2020 Jan 17;10(6):3115–21. doi: 10.1039/c9ra09951d (PMC9048418; doi:10.1039/c9ra09951d), 2020-01-17
Supplement: RA-010-C9RA09951D-s001.pdf [file RA-010-C9RA09951D-s001.pdf]

## Supporting information

**Fig. S1** DPV curves of the bare GC electrode (a), the CB-nafion/Fc/CB/GC electrode (b), the MWNT-nafion/Fc/MWNT/GC electrode (c), and the modified CB-MWNT-nafion/Fc/CB-MWNT/GC electrode (d) in 250  $\mu\text{M}$  IAA and 250  $\mu\text{M}$  SA in PBS (pH=7.4, 10 mM).

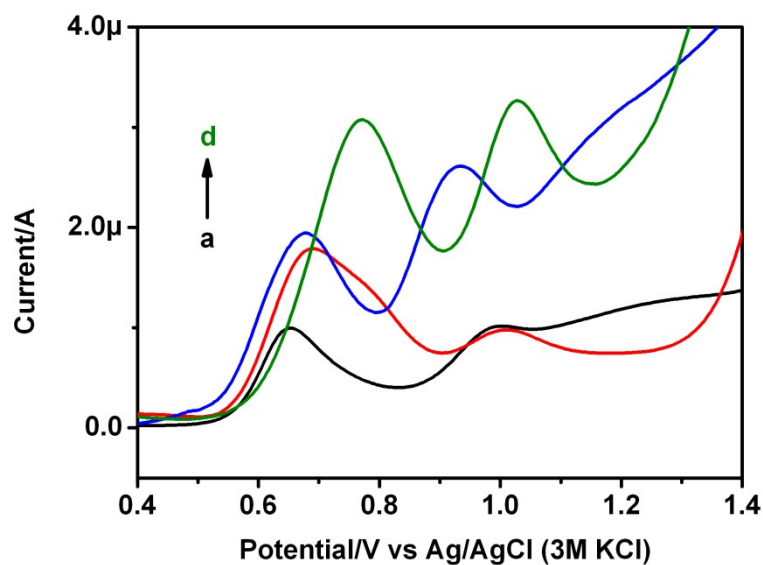

**Fig. S2** Optimization of the modification process with different concentrations of CB using 250  $\mu\text{M}$  SA.

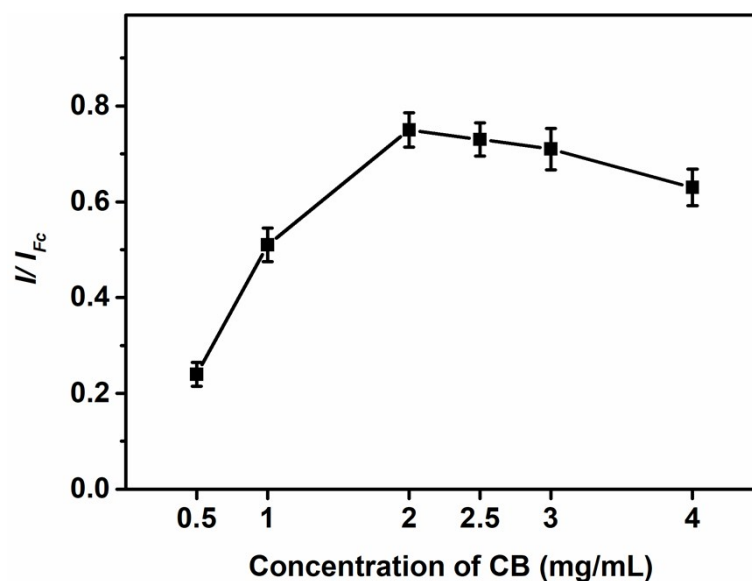

**Fig. S3** Optimization of the modification process with different concentrations of MWNT using 250  $\mu$ M IAA.

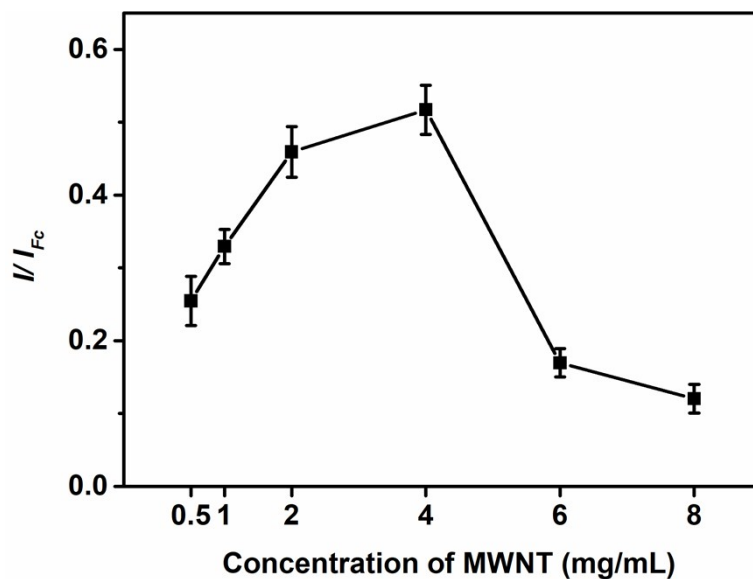

**Fig. S4** The DPV curves of IAA and SA using six freshly prepared CB-MWNT-nafion/Fc/CB-MWNT/GC electrodes for 250  $\mu$ M IAA and 250  $\mu$ M SA in PBS (pH=7.4, 10 mM).

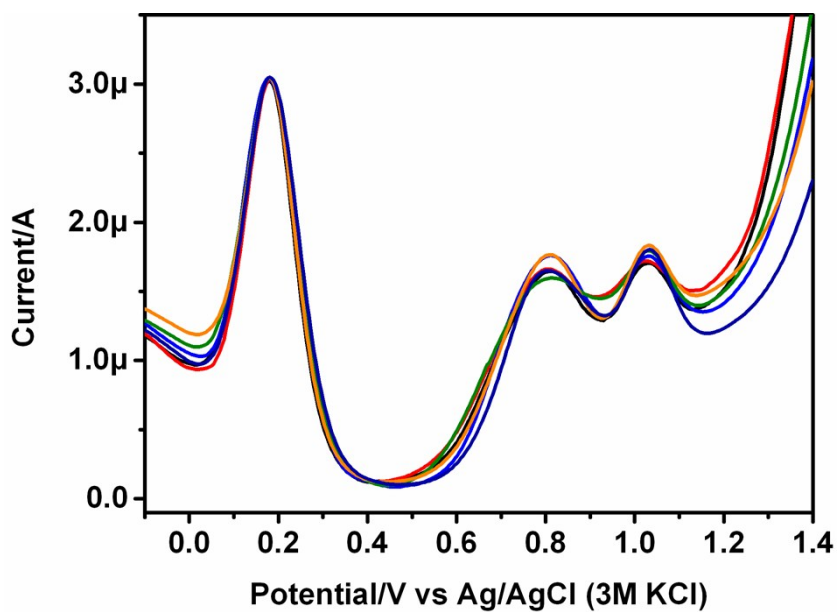

**Table S1**

Comparisons of the previous reported IAA detection methods.

| Detector                                                                                             | Method       | Linear range               | LOD                | References |
|------------------------------------------------------------------------------------------------------|--------------|----------------------------|--------------------|------------|
| Multiwalled carbon nanotubes-chitosan modified glassy carbon electrode                               | DPV          | 0.67–48.82 $\mu\text{M}$   | 0.1 $\mu\text{M}$  | [1]        |
| Carbon tape modified electrode                                                                       | DPV          | 1–100 $\mu\text{M}$        | 0.1 $\mu\text{M}$  | [2]        |
| $\text{SiO}_2$ @AuNPs modified glassy carbon electrode                                               | DPV          | 0.2–55 $\mu\text{M}$       | 5.19 nM            | [3]        |
| Hemin/reduced graphene oxide composite modified glassy carbon electrode                              | i-t          | 0.1–43 $\mu\text{M}$       | 74.0 nM            | [4]        |
| multiwalled carbon nanotubes and sucrose derived carbon modified glassy carbon electrode             | DPV          | 0.1–30 $\mu\text{M}$       | 29.6 nM            | [5]        |
| 3-mercaptopropionic acid stabilized CdS/reduced graphene oxide nanocomposites modified ITO electrode | Photocurrent | 0.57 nM–5.71 $\mu\text{M}$ | 0.29 nM            | [6]        |
| 4-allyloxy-7-aminocoumarin polymer membrane                                                          | Fluorescence | 1–1000 $\mu\text{M}$       | 0.90 $\mu\text{M}$ | [7]        |

|                                                       |                                                                                   |                       |            |           |
|-------------------------------------------------------|-----------------------------------------------------------------------------------|-----------------------|------------|-----------|
| Ionic liquid-modified silica sorbent                  | HPLC                                                                              | 1–200<br>μM           | 0.91<br>μM | [8]       |
| Carbon felt detector                                  | HPLC with electrochemical detection                                               | 1-100<br>mM           | 1.1<br>mM  | [9]       |
| Symmetry C8 column                                    | Reversed phase high performance liquid chromatography (RP-HPLC) with fluorescence | 0.36-71.4<br>μM       | 85.6<br>nM | [10]      |
| 6-Oxy-(acetyl piperazine) fluorescein label           | Capillary electrophoresis with laser-induced fluorescence (CE-LIF)                | 0.02–1.0<br>μM        | 4.8<br>nM  | [11]      |
| Tetraazacalix[2]arene[2] triazine-modified silica gel | Open-tubular capillary electrochromatography                                      | 0.29-11.4<br>μM       | 45.7<br>nM | [12]      |
| Modified CB-MWNT-nafion/Fc/CB-MWNT/GC electrode       | DPV                                                                               | 25.0–<br>1000.0<br>μM | 1.99<br>μM | This work |

---

**Table S2**

Comparisons of the previous reported SA detection methods.

| Detector                                                               | Method                                                      | Linear range                                          | LOD                | References |
|------------------------------------------------------------------------|-------------------------------------------------------------|-------------------------------------------------------|--------------------|------------|
| Multiwalled carbon nanotubes-chitosan modified glassy carbon electrode | DPV                                                         | 0.67–48.82 $\mu\text{M}$                              | 0.1 $\mu\text{M}$  | [1]        |
| Carbon tape modified electrode                                         | DPV                                                         | 1–100 $\mu\text{M}$                                   | 0.1 $\mu\text{M}$  | [2]        |
| Pt nanoparticles modified Pt disk electrode                            | i-t                                                         | 20–500 $\mu\text{M}$                                  | 6.4 $\mu\text{M}$  | [13]       |
| Nickel titanate nanoceramic modified carbon paste electrode            | DPV                                                         | 3.0–40.0 $\mu\text{M}$ ,<br>40.0–1000.0 $\mu\text{M}$ | 68.0 nM            | [14]       |
| Screen printed electrodes                                              | SWV                                                         | 16–300 $\mu\text{M}$                                  | 5.6 $\mu\text{M}$  | [15]       |
| Pencil trace modified carbon tape electrode                            | SWV                                                         | 0.1–100 $\mu\text{M}$                                 | 0.1 $\mu\text{M}$  | [16]       |
| Nucleosil 100-5 C18 column                                             | Liquid chromatographic–tandem mass spectrometric (LC–MS/MS) | 0.72–7.2 $\mu\text{M}$ , 72–360 $\mu\text{M}$         | 0.36 $\mu\text{M}$ | [17]       |

|                                                                                                   |                                                                                                  |                  |         |           |
|---------------------------------------------------------------------------------------------------|--------------------------------------------------------------------------------------------------|------------------|---------|-----------|
| Agilent Eclipse C18 analytical column                                                             | Liquid chromatographic–tandem mass spectrometric (LC–MS/MS)                                      | 36.2–362 nM      | 22 nM   | [18]      |
| Polymeric adsorbent (Super Q) filters                                                             | Vapor-phase extraction and gas chromatography–positive ion chemical ionization–mass spectrometry | 36.2 nM–7.24 μM  | 3.6 nM  | [19]      |
| ProntoSIL 120 C18 ace-<br>EPS column<br>protected by C8 guard<br>column                           | Isocratic high-pressure liquid chromatography with post-column hydrolysis and fluorescence       | 0.36–144.8 μM    | 0.11 μM | [20]      |
| Mercaptopropionic acid (MPA)–capped cadmium telluride (CdTe) quantum dot (QDs) fluorescent probes | Fluorescence                                                                                     | 3.62–289.6 μM    | 1.09 μM | [21]      |
| Disposable terbium (III) salicylate complex imprinted membrane                                    | Solid phase surface fluorescence                                                                 | 144.8 μM–3.62 mM | 0.1 μM  | [22]      |
| Modified CB-MWNT-nafion/Fc/CB-MWNT/GC electrode                                                   | DPV                                                                                              | 25.0–1000.0 μM   | 3.3 μM  | This work |

---

**Table S3**

Intra-assay (six measurements for one modified electrode) and inter-assay (six freshly prepared electrodes) of IAA and SA.

| IAA<br>( $\mu\text{M}$ ) | Intra-assay |      | Inter-assay |      | SA<br>( $\mu\text{M}$ ) | Intra-assay |      | Inter-assay |      |
|--------------------------|-------------|------|-------------|------|-------------------------|-------------|------|-------------|------|
|                          | Mean        | CV   | Mean        | CV   |                         | Mean        | CV   | Mean        | CV   |
| 50                       | 49.18       | 2.47 | 48.89       | 3.63 | 50                      | 49.08       | 3.08 | 48.91       | 4.02 |
| 250                      | 241.13      | 3.32 | 238.77      | 5.18 | 250                     | 245.88      | 3.12 | 246.76      | 4.95 |

CV represents coefficient of variation.

**Table S4**

Results obtained by the developed microsensor for detecting IAA and SA in the stem of soybean seedlings.

| Time<br>(h) | Control                  |      |                         |       | Salt stress              |      |                         |       |
|-------------|--------------------------|------|-------------------------|-------|--------------------------|------|-------------------------|-------|
|             | IAA<br>( $\mu\text{M}$ ) | SD   | SA<br>( $\mu\text{M}$ ) | SD    | IAA<br>( $\mu\text{M}$ ) | SD   | SA<br>( $\mu\text{M}$ ) | SD    |
| 0           | 69.98                    | 6.59 | 317.89                  | 18.12 | 64.08                    | 6.28 | 314.91                  | 19.32 |
| 12          | 61.11                    | 6.05 | 324.28                  | 19.18 | 124.69                   | 6.67 | 336.83                  | 14.04 |
| 24          | 77.52                    | 7.13 | 300.96                  | 17.88 | 40.35                    | 3.11 | 427.40                  | 19.12 |
| 36          | 73.75                    | 6.28 | 302.25                  | 14.20 | 33.56                    | 1.63 | 740.30                  | 15.47 |

SD represents standard deviation.

## References:

- [1] L. Sun, X. Liu, L. Gao, Y. Lu, Y. Li, Z. Pan, et al., Simultaneous Electrochemical Determination of Indole-3-acetic Acid and Salicylic Acid in Pea Roots using a Multiwalled Carbon Nanotube Modified Electrode, *Anal. Lett.* 48 (2015) 1578-1592.
- [2] L. Sun, J. Zhou, J. Pan, Y. Liang, Z. Fang, Y. Xie, et al., Electrochemical mapping of indole-3-acetic acid and salicylic acid in whole pea seedlings under normal conditions and salinity, *Sens. Actuat, B* 276 (2018) 545-551.
- [3] J. Sun, T. Gan, R. Zhai, W. Fu, M. Zhang, Sensitive and selective electrochemical sensor of diuron against indole-3-acetic acid based on core-shell structured SiO<sub>2</sub>@Au particles, *Ionics* 24 (2018) 2465-2472.
- [4] F. Liu, J. Tang, J. Xu, Y. Shu, Q. Xu, H. Wang, et al., Low potential detection of indole-3-acetic acid based on the peroxidase-like activity of hemin/reduced graphene oxide nanocomposite, *Biosens. Bioelectron.* 86 (2016) 871-878.
- [5] L. Lu, Y. Yu, H. Zhou, P. Li, Y. Peng, W. Wang, et al., Sensitive Electrochemical Determination of Indole-3-Acetic Acid Based on Multiwalled Carbon Nanotubes and Sucrose-Derived Carbon Composites, *Int. J. Electrochem. Sci.* 11 (2016) 2392-2400.
- [6] L.-J. Sun, Q.-M. Feng, Y.-F. Yan, Z.-Q. Pan, X.-H. Li, F.-M. Song, et al., Paper-based electroanalytical devices for in situ determination of salicylic acid in living tomato leaves, *Biosens. Bioelectron.* 60 (2014) 154-160.
- [7] C.X. Jiao, C.G. Niu, L.X. Chen, G.L. Shen, R.Q. Yu, 4-allyloxy-7-aminocoumarin as a fluorescent carrier for optical sensor preparation and indole-3-acetic acid assay, *Sens. Actuat B-Chem* 94 (2003) 176-183.
- [8] L. Sheikhan, S. Bina, Simultaneous extraction and HPLC determination of 3-indole butyric acid and 3-indole acetic acid in pea plant by using ionic liquid-modified silica as sorbent, *Journal Of Chromatography B-Analytical Technologies In the Biomedical And Life Sciences* 1009 (2016) 34-43.
- [9] H. Dejmekova, M.D. Daniel, Electrochemical determination of indole-3-acetic acid and indole-3-butyric acid using HPLC with carbon felt detector, *Monatsh. Chem.* 150 (2019) 439-442.
- [10] M. Szkop, W. Bielawski, A simple method for simultaneous RP-HPLC determination of indolic compounds related to bacterial biosynthesis of indole-3-acetic acid, *Anton Leeuw Int J G* 103 (2013) 683-691.
- [11] H. Chen, X.-F. Guo, H.-S. Zhang, H. Wang, Simultaneous determination of phytohormones containing carboxyl in crude extracts of fruit samples based on chemical derivatization by capillary electrophoresis with laser-induced fluorescence detection, *J. Chromatogr. B* 879 (2011) 1802-1808.
- [12] L. Yang, Y.L. Chen, S.N. Zhao, W.F. Zhang, H.F. Du, Z.F. Deng, et al., Simultaneous Determination of Indole-3-Acetic Acid and Indole-3-Butyric Acid in Plant by Field-Amplified Sample Stacking Open-Tubular Capillary Electrochromatography Based on Solid-Phase Extraction with Calixarene Sorbent, *Chromatographia* 79 (2016) 243-254.
- [13] Z. Wang, F. Ai, Q. Xu, Q. Yang, J.-H. Yu, W.-H. Huang, et al., Electrocatalytic activity of salicylic acid on the platinum nanoparticles modified electrode by electrochemical deposition, *Colloids Surf., B* 76 (2010) 370-374.



- [14] S.M. Ghoreishi, F.Z. Kashani, A. Khoobi, M. Enhessari, Fabrication of a nickel titanate nanoceramic modified electrode for electrochemical studies and detection of salicylic acid, *J. Mol. Liq.* 211 (2015) 970-980.
- [15] S. Rawlinson, A. McLister, P. Kanyong, J. Davis, Rapid determination of salicylic acid at screen printed electrodes, *Microchem. J.* 137 (2018) 71-77.
- [16] H. Wang, X. Bi, Z. Fang, H. Yang, H. Gu, L. Sun, et al., Real time sensing of salicylic acid in infected tomato leaves using carbon tape electrodes modified with handed pencil trace, *Sens. Actuat. B* 286 (2019) 104-110.
- [17] S. Croubels, A. Maes, K. Baert, P. De Backer, Quantitative determination of salicylic acid and metabolites in animal tissues by liquid chromatography–tandem mass spectrometry, *Anal. Chim. Acta* 529 (2005) 179-187.
- [18] W. Zheng, K.H. Yoo, A.M. Abd El-Aty, D.H. Park, J.M. Choi, S.K. Kim, et al., Quantitative determination of carbasalate calcium derived metabolites, acetylsalicylic acid and salicylic acid, in six animal foods using liquid-liquid extraction method coupled with liquid chromatography-tandem mass spectrometry, *Food Chem.* 278 (2019) 744-750.
- [19] J. Engelberth, E.A. Schmelz, H.T. Alborn, Y.J. Cardoza, J. Huang, J.H. Tumlinson, Simultaneous quantification of jasmonic acid and salicylic acid in plants by vapor-phase extraction and gas chromatography-chemical ionization-mass spectrometry, *Anal. Biochem.* 312 (2003) 242-250.
- [20] E.L. Hobl, B. Jilma, J. Ebner, R.W. Schmid, Simultaneous determination of acetylsalicylic acid and salicylic acid in human plasma by isocratic high-pressure liquid chromatography with post-column hydrolysis and fluorescence detection, *Biomed. Chromatogr.* 27 (2013) 695-698.
- [21] O. Bunkoed, P. Kanatharana, Mercaptopropionic acid-capped CdTe quantum dots as fluorescence probe for the determination of salicylic acid in pharmaceutical products, *Luminescence* 30 (2015) 1083-1089.
- [22] J.X. Huang, Y.F. Hu, Y.L. Hu, G.K. Li, Disposable terbium (III) salicylate complex imprinted membrane using solid phase surface fluorescence method for fast separation and detection of salicylic acid in pharmaceuticals and human urine, *Talanta* 107 (2013) 49-54.
